# Supplementary material for: Acetic Acid-Induced Ulcerative Colitis in Sprague Dawley Rats Is Suppressed by Hydroethanolic Extract ofCordia vigneiLeaves through Reduced Serum Levels of TNF-αand IL-6
Source: Hindawi journal article supplement (doi:10.1155/2020/8785497), 2020-02-06
Supplement: f1 [file 8785497.f1.pdf]

1 **Supplementary Data**

2  
3 **Materials and Methods**

4  
5 **Materials**

6  
7 Ferric chloride, conc H<sub>2</sub>SO<sub>4</sub>, Potassium bismuth iodide solution, chloroform (all chemicals were  
8 supplied by Department of Pharmacognosy, KNUST, Kumasi Ghana).

9  
10 **Method**

11  
12 Fresh leaves of *Cordia vignei* were collected and processed to obtain the extract as described in  
13 section 2.1.

14  
15 **1. Phytochemical screening of hydroethanolic extract of *Cordia vignei* leaves.**

16  
17 The extract was screened qualitatively for the presence of phytochemicals such as tannins,  
18 saponins, glycosides, steroids, alkaloids, coumarins, flavonoids and terpenoids by using simple  
19 protocols as described by Sofowora, (1993) [34].

20 **2. Fourier transform infrared (FTIR)-spectroscopic analysis of the extract**

21 The Fourier transform infrared spectroscopy was conducted to detect the characteristic functional  
22 groups of the hydroethanolic extract of *Cordia vignei* leaves using the procedure previously  
23 described by Pavia *et al.*, (2001) [35] and Lakshmia *et al.*, (2015) [36]. Briefly, 5 mg of the extract  
24 was pressed with potassium bromide (KBr) and the pellet was analyzed by using Spectrum Two  
25 FT-IR Spectrometer (PERKIN-ELMER, UATR2, 94133, USA).

26 **Results**

27 **1. Phytochemical screening of the extract**

28 The qualitative phytochemical test showed that saponins, tannins, alkaloids, flavonoids and  
29 terpenoids were present in the extract.

30 **2. Fourier transform infrared (FTIR) spectroscopy**

31 The Fourier transform infrared (FTIR) spectra are shown in the figure S1 below. The characteristic  
32 functional groups representing these peaks (cm<sup>-1</sup>) are presented in table S1. Wavenumbers in the  
33 fingerprint region (1500-400 cm<sup>-1</sup>) and their functional groups were not shown on the table.

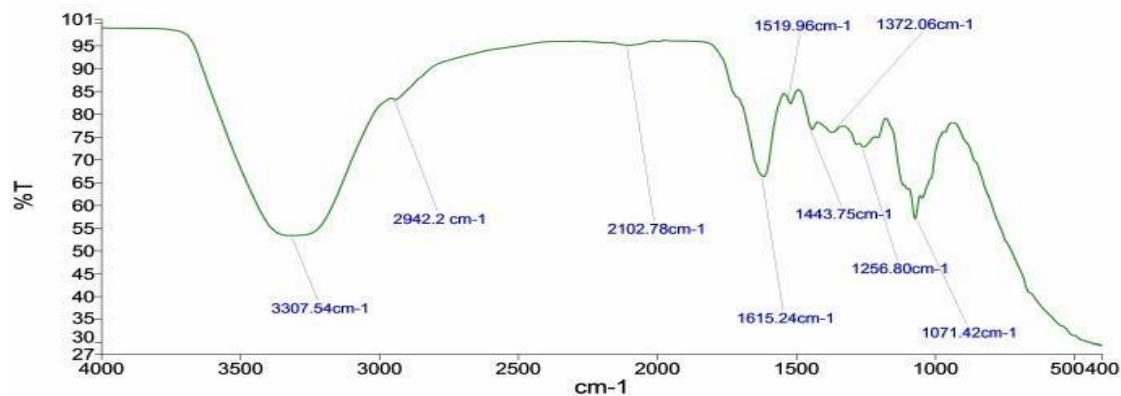

34

35 Figure S1. Fourier transform infrared spectra of hydroethanolic extract of *Cordia vignei* leaves.  
 36 Five milligram (5 mg) of the extract was pressed with KBr to form a disc and this was analyzed  
 37 by using Spectrum Two FT-IR Spectrometer. The results were presented as wavenumber ( $\text{cm}^{-1}$ )  
 38 (horizontal) against percentage transmittance (% T) (vertical). The wavenumbers and their  
 39 corresponding functional groups are presented in the table S1 below.

40

41 Table S1. Characteristic functional groups identified in FTIR spectroscopy

| number | Wavenumber ( $\text{cm}^{-1}$ ) | Functional groups |
|--------|---------------------------------|-------------------|
| 1      | 3307.20, 1256.80                | Phenol            |
| 2      | 3307.20, 1071.42                | Alcohol           |
| 3      | 2933.69                         | Alkane            |
| 4      | 1615.24                         | Alkene            |
| 5      | 1517.93                         | Aromatic compound |

42 Five milligram (5 mg) of the extract was pressed with potassium bromide (KBr) to form a disc and  
 43 this was analyzed by using Spectrum Two FT-IR Spectrometer. The results were presented as  
 44 wavenumber ( $\text{cm}^{-1}$ ) (horizontal) against percentage transmittance (% T) (vertical) as shown on  
 45 figure S1 above.

46

47

48

49

50

51

52

53
